# Supplementary material for: Expression of Lanthipeptides in Human Cells
Source: PubMed Central journal article supplement (PMC10634679; doi:10.1101/2023.10.19.563208), 2023-10-23
Supplement: media-1.pdf [file media-1.pdf]

## Supporting Information

### Expression of Lanthipeptides in Human Cells

Sara M. Eslami<sup>1</sup>, Imran R. Rahman<sup>2</sup>, and Wilfred A. van der Donk<sup>1,2,\*</sup>

<sup>1</sup>Department of Chemistry and Howard Hughes Medical Institute, University of Illinois at Urbana-Champaign, Urbana, Illinois 61801, USA

<sup>2</sup>Department of Biochemistry, University of Illinois at Urbana-Champaign, Urbana, Illinois 61801, USA

\* E-mail [vddonk@illinois.edu](mailto:vddonk@illinois.edu), 217 244 5360

### Codon optimized primers and genes used in this study

|                                        |                                                                                                                                                                                                                                                                                                                                                                                                                                                                                                                                                                                                                                                                                                                                                                                                                                                                                                                                                                                                                                                                                                                                                                                                                                                                                                                                                                                                                                                                                                                                                                                                                                                                                                                                                                                                                                                                                                                                                                                                                                                                                                                                                                                                                                                                                                                                                                                                                                                       |
|----------------------------------------|-------------------------------------------------------------------------------------------------------------------------------------------------------------------------------------------------------------------------------------------------------------------------------------------------------------------------------------------------------------------------------------------------------------------------------------------------------------------------------------------------------------------------------------------------------------------------------------------------------------------------------------------------------------------------------------------------------------------------------------------------------------------------------------------------------------------------------------------------------------------------------------------------------------------------------------------------------------------------------------------------------------------------------------------------------------------------------------------------------------------------------------------------------------------------------------------------------------------------------------------------------------------------------------------------------------------------------------------------------------------------------------------------------------------------------------------------------------------------------------------------------------------------------------------------------------------------------------------------------------------------------------------------------------------------------------------------------------------------------------------------------------------------------------------------------------------------------------------------------------------------------------------------------------------------------------------------------------------------------------------------------------------------------------------------------------------------------------------------------------------------------------------------------------------------------------------------------------------------------------------------------------------------------------------------------------------------------------------------------------------------------------------------------------------------------------------------------|
| SME_CyILL-S15T.F1                      | CTGCGTCAACGGCTGCATGCGGCTGGGTGGGCGGCG                                                                                                                                                                                                                                                                                                                                                                                                                                                                                                                                                                                                                                                                                                                                                                                                                                                                                                                                                                                                                                                                                                                                                                                                                                                                                                                                                                                                                                                                                                                                                                                                                                                                                                                                                                                                                                                                                                                                                                                                                                                                                                                                                                                                                                                                                                                                                                                                                  |
| SME_CyILL-S15T.R1                      | GCATGCAGCCGTTGACGCAGCAGCAGTAGCAGCCACG                                                                                                                                                                                                                                                                                                                                                                                                                                                                                                                                                                                                                                                                                                                                                                                                                                                                                                                                                                                                                                                                                                                                                                                                                                                                                                                                                                                                                                                                                                                                                                                                                                                                                                                                                                                                                                                                                                                                                                                                                                                                                                                                                                                                                                                                                                                                                                                                                 |
| SME_pCMV-NLS.R2                        | cactttgcgtttctctTGGGCCCGGATTTTCTTCG                                                                                                                                                                                                                                                                                                                                                                                                                                                                                                                                                                                                                                                                                                                                                                                                                                                                                                                                                                                                                                                                                                                                                                                                                                                                                                                                                                                                                                                                                                                                                                                                                                                                                                                                                                                                                                                                                                                                                                                                                                                                                                                                                                                                                                                                                                                                                                                                                   |
| SME_pCMV-NLS.F2                        | aagaagaaacgcaaagtGACTACAAGGACGACGACGAC                                                                                                                                                                                                                                                                                                                                                                                                                                                                                                                                                                                                                                                                                                                                                                                                                                                                                                                                                                                                                                                                                                                                                                                                                                                                                                                                                                                                                                                                                                                                                                                                                                                                                                                                                                                                                                                                                                                                                                                                                                                                                                                                                                                                                                                                                                                                                                                                                |
| SME-NLS_pCMV-FLAG                      | CGAAGAAAATCCGGGCCCAaagaagaaacgcaaagtGACTACAAG                                                                                                                                                                                                                                                                                                                                                                                                                                                                                                                                                                                                                                                                                                                                                                                                                                                                                                                                                                                                                                                                                                                                                                                                                                                                                                                                                                                                                                                                                                                                                                                                                                                                                                                                                                                                                                                                                                                                                                                                                                                                                                                                                                                                                                                                                                                                                                                                         |
| SME_CyILL_NDT.R3                       | cctgactccagtgaagattccAHNgccacccaAHNgcacgagccgttgacgcagcAHNagtagcagcAHNggcgcaAHNtggagtcgtc                                                                                                                                                                                                                                                                                                                                                                                                                                                                                                                                                                                                                                                                                                                                                                                                                                                                                                                                                                                                                                                                                                                                                                                                                                                                                                                                                                                                                                                                                                                                                                                                                                                                                                                                                                                                                                                                                                                                                                                                                                                                                                                                                                                                                                                                                                                                                             |
| <i>H. sapiens</i> codon-optimized CylM | tcagaggacaacctcatcaactgtttcaatcaacgagagatgtttcctttgaagcaatctggaagagagaagtagcacataaagaacttgcagacttgaagagagagaaagagtgcttaagcaagcagacttggactacctatcaagtagcaagtagcagcttggacaacttgcgacttggatcacacccatcgagaacttccctgacaaggaagtcgcaatccaatcaccaaggaccaatcctggtacataattctcgagtcactcgcactcatacaacgactctgaggagaagctcctcgaggtggacgcttacccttccgctacttctgcaatagcctgattgttctgctgacactcagactcaacatctgtactaagagttcatcataaacctcttgagactctcactcaagagttgatacacttaccatccaagactctgtccttgactgacacgttcaagaagaacgaccactcaaggggaacgacagttccaagagattcatctactcctcaagaagcagattcaactcaagaagacatcgctttctcacagctgttacccccgagctcatcggatcacagtggtgctgagatacttctgacaatacgaagcagatgctaccgggtcactgaggactgcttccatccaaaactgttcaacatccaatccaggagactcaacagatcagtgagtcacaggggactcacactcaggggaagacagtgctcagcctcactttctcagacggcaagaagatgctcacaagcctaaagataaaactcgagaacaagctcagagacttctcaggttctgaacaaggagctcgaggcagacatctacatcgtaagaaggttacacgtaaaccttactctcagaggagtagacaatcagattacgattacaataatagaagaggtcaagaagtagtagcagcgggaaggtgatcggtatcgcgttctcctcaacgctcactgatctccactacgagaatattatcgcgcacggggagtagccctgtcatcgcgacaacgagacttctccaaacaacataccatcgagttcggcaactctgactgacgctaaagtataagtagtggacagtagatgtaactgggctcgtgcccactctgccaatgaaggacaagtcggacagtaaggacgaggggtgtgaacctctgctcttaactcaaggagcaaaagtgtcccctcaagatattgaagatcaagaacacttctcactgacgagatgaggttcgagtagcaaacacacatcatggacacagtaagaacacacctataatgaacaagagaagattcattcattcacaagagtagatcgttacaggtatgaagtcctcctcaagggtaaggactcaaaaaaagatcctcgcatacatcaacaacaatctccaaaacttgatcgaagaacgtcatccgcccacacaacggtagcggagatgctcaggtcagttaccacccaactgtttctcaacgcaatcgagcgggagaaggtcctcacaacatgtgggcttaccctcaagaacaagaaggtgtccactcagagttctctgacctatagacggagacatccccatcttacaacaacatctcaagacatcccctcatcgctccgacggatgcttggctgagggacttccaagagagcgcattgaaccgatgttgaacaagataaacgaccttgcgacgagacatcagatccaacaagatttgctcgagatagctctcaacatcacaatccatataagtagacataaacgacctaaagaatcaaaactccaataagtagatctactggtcagactcaacggaaagatcacaagctgtcaaaagatcgagaagaagatttcaagcgggcaatttcaataagaagacgaacactgtaaaactggatcgacataaaagctgaccaagactggaactgtggaatcctcaacaacaacatgtacgacgggtcccaggcatattcatctctcagctcgcactcaagtagtacacaagaatcacaagtagcactcagctcatgaggtgatcaagaactcaatatacactatccctccgaggaacatcctcctcgttctcgggaaggggtcctgatataccattgttgggactaccgactcaacaacgacataaacagctcaacgttgcagctcagatcgtgacatgctcatagagaagaagcctataacaacgggagcttaagaacgactggatccacggacacaactccatcatcaaggtcctgctctttgtccgagatcactgaggacgagaagtaggaagttctcactcgagatctcgagaagctcggaggacactcaactcaggg |

|                                                          |                                                                                                                                                                                                                                                                                                                                                                                                                                                                                                                                                                                                                                                                                                                                                                                                                                                                                                                                                                                                                                                                                                                                                                                                                                                                                                                                                                                                                                                                                                                                                                                                                                                                                                                                                                                                                                                                                                                                                                                                                                                                                                                                                                                                                                                                                                                                                                                                                                                                                                                                                                                                                                                                                                                                                                                                                                                                                                                                                                                                                                               |
|----------------------------------------------------------|-----------------------------------------------------------------------------------------------------------------------------------------------------------------------------------------------------------------------------------------------------------------------------------------------------------------------------------------------------------------------------------------------------------------------------------------------------------------------------------------------------------------------------------------------------------------------------------------------------------------------------------------------------------------------------------------------------------------------------------------------------------------------------------------------------------------------------------------------------------------------------------------------------------------------------------------------------------------------------------------------------------------------------------------------------------------------------------------------------------------------------------------------------------------------------------------------------------------------------------------------------------------------------------------------------------------------------------------------------------------------------------------------------------------------------------------------------------------------------------------------------------------------------------------------------------------------------------------------------------------------------------------------------------------------------------------------------------------------------------------------------------------------------------------------------------------------------------------------------------------------------------------------------------------------------------------------------------------------------------------------------------------------------------------------------------------------------------------------------------------------------------------------------------------------------------------------------------------------------------------------------------------------------------------------------------------------------------------------------------------------------------------------------------------------------------------------------------------------------------------------------------------------------------------------------------------------------------------------------------------------------------------------------------------------------------------------------------------------------------------------------------------------------------------------------------------------------------------------------------------------------------------------------------------------------------------------------------------------------------------------------------------------------------------------|
|                                                          | gcttcggacacgggatctactcatactgcccactctgtccaagttcaacaggatcgacaaggctaactcctgctcacaagatcaaggagt<br>catactcgaaggagcacaagaacaactctgtgcaagggaactgtggcgagctctggctacgatcgagttgacgacgacaaca<br>tatccaatattgacatcaataagactatagcgtacaagaacaaggactgtcttgcacggaaacgctggaacactcaggggctgatacaa<br>ctcgtaagaaggaccctgagacttacaatacaagaacaagctcatalcatalcactcaacgactcggagagaacaacaacact<br>caaggtagcggggagtgactgtggagtcactgtggtctctcgtgggaatcctcggagtcggatagcagttgctcagaacacctgactccga<br>gatccctaacgctgtcttctgagctc                                                                                                                                                                                                                                                                                                                                                                                                                                                                                                                                                                                                                                                                                                                                                                                                                                                                                                                                                                                                                                                                                                                                                                                                                                                                                                                                                                                                                                                                                                                                                                                                                                                                                                                                                                                                                                                                                                                                                                                                                                                                                                                                                                                                                                                                                                                                                                                                                                                                                                                                             |
| <i>H. sapiens</i> codon-<br>optimized CyILL-S15T         | tcacaagaccctaactctgagaacctcagtgtagtgcctcttctgaggagcttctgttgaggagatggaagccattcaagggaagtggggat<br>gtgcaagctgagacgactccagtgctgcggcgtgctgactgctgctgctcaacggctgcatgctggctgggtggcgccggaatcttcac<br>tggagtcacggtagtggtgtccctcaagcactgttga                                                                                                                                                                                                                                                                                                                                                                                                                                                                                                                                                                                                                                                                                                                                                                                                                                                                                                                                                                                                                                                                                                                                                                                                                                                                                                                                                                                                                                                                                                                                                                                                                                                                                                                                                                                                                                                                                                                                                                                                                                                                                                                                                                                                                                                                                                                                                                                                                                                                                                                                                                                                                                                                                                                                                                                                            |
| <i>H. sapiens</i> codon-<br>optimized HalM               | aaaacccactgacgtcagatccttcaactcagactctgcctcacactaatgacaccgattggctcgaacaactcatgacatactc<br>tccatccccgtgactgaggaatccagaataatcttcacgcagagaacgatctctcattctctatacccttccctgcaattcacatcaga<br>gtatgagcacttattgacctttaaaccgatatgcccctgattgaacgacaatctctcctcaatctactttaactcgtgtacatcatcggt<br>gttccaccttacacatgcacgctgatctcagagatgcacattgataaactacagtggttctaaacggtagcaccctcacgaaaggtat<br>ggattttaatacaaaatcaaaaaacatcaaatcaagaatctctcaacatatacccgatactgggcaagcgtgtagtcaacgagactct<br>ccgaacgataaattttgtaagaaaattatacaactatatagaaggactatcttctcagtcagtcacttcaaggagaagacctgagactg<br>aacccctcaactgggagtcggcgacacctgtaaatggccaatgctgacaattctgacatttgcgagcggacaagaagtagtgataaa<br>gcccggaagtctgtctatcagataagcaattggcgaattatagatgggtaaatcaagggttcaaccttctctcgcattccaatagccatt<br>gacaggcaaacctacgagtggtacgatttatacccatcaagaagctacaagcagggacgaaattgagcgtattactcccgcataggt<br>ggatacctcgcaattgcttctctcggggctacggatctgcaacctggataacctatcgcgtgtggagaacaccccctgctgattgatctcga<br>aaccccttcaactaagcctggactgctatgattccgcttccattccagccttggctcgcgagctcagcaatcagatttccgacccctcat<br>gttaccatcactatcgcactgtgtaagttatggacattgaccttccagcctcggcgggaaagggcgtcgaagcgagaagattaaaa<br>ctgggtcatcgtaaatcaaaagacggatgagatgaaattggtgaaacacctatgtgactgagagcaccgagaataaacccacggcaca<br>cggcaaggaagcaaataggaattacatccacatgtgaccgacgggttccgaaatgtaccgattatttctaatgaaatcgatgaact<br>gatggtcataatggcctatttctgactcagagcgtgcaaacccggcagctgtttagggtactcagatgataatgcaaaattctggaagctct<br>actcactcgtgattactacaagaaccaactaggcgaataaactcttgaagcttctggaatataacatccctcatggcctttaaagaaaat<br>tgtccacacgagatcgagaactcgagaatcagatattccatattctgtttgacatgtggcggcaccatcgtaagatggatagccgca<br>gacatagcagatctgtccaatctagtgtatagaaaggtgactcatagactcagcaactgggactccgaagacgagggcccgaacaatca<br>gataattaagtcagcttggcaacctgaccaacggggactggaccccatcacgaaaagaccccgatgagtcagctagctagcggcga<br>ccgcaagacgggtatttctcggcaagcccaagcgattggagatgacattctgctcaactatttgggaagatgacagggcacgctgcat<br>acctgatcgggtctcagtcggcatgaatgaggcggtagccgtatccctctgactccaggaatctatgattgactcaggggatcgtgctctt<br>ctttgatcaactcgcgcaacaacgggtgagacgcatatagacatgctgcagacgcaatttggaaaggatgtcaacaatgaaagcca<br>gagttgatgccctcaagcgcatacttggactgggagcttcttctacggctctatggtgctcggctcgaacgatccgacagccacattata<br>gaaggcctatgaatacttaagcacttggagaatgtgtgagcatgaagagacgcccgatttctgctcaggccttagtggcgtgctctatag<br>cttaccaaaatatacagttgactaatgagccacgctatttgggtagccaaaaccacagctcccagcttagtcttattagatagcaaac<br>aacccgacaccgcttgacaggttgatcagcggcggcgggttggcctcgcgctcctcactatggtactgcccgtaacgacgaacaa<br>ctcctcaacaaggcactcctatctctgatatagcgaatagattaataagcaagagaataatgggtgacctcggaaaggaaatgc<br>ctatcaaacattctggtgcatggtgcccctgtattggaattagcaggctgtactggtcctcaattttatgatgacgagttgttgacgaggaact<br>aacgccgtctgaataagactataagcagatggtttgggcacaaccattctctgtgccaggaatttggaaacctgatctgtgtgctc<br>cgccaatatacaataatccagaacaaaaaactggcaggaagctggccatctctatagatcaggtcctacatctatggtggaa<br>actcggcctgaatcacagtaccatcaaggaatgatgctcggcgtgacaggaataggataccggttacttagacatataaacctcag<br>gttccctctatattggcctggaactcccagtagtacactgaccgaaaggaaactcagaatccacgaccggca |
| <i>H. sapiens</i> codon-<br>optimized FactorXa-<br>HalA2 | gttaattctaaagatcctcgaatctgaaattcggaaagctcaggcctgcaattcgtcagcagggtaaacgagaagaattgtcaagcctg<br>gccgggtctggagatagaaagcagacatggccctgtgcaacggctcggagtcagcgtcgcgttatgcccaaccactaagtgac<br>ctctcagtgctag                                                                                                                                                                                                                                                                                                                                                                                                                                                                                                                                                                                                                                                                                                                                                                                                                                                                                                                                                                                                                                                                                                                                                                                                                                                                                                                                                                                                                                                                                                                                                                                                                                                                                                                                                                                                                                                                                                                                                                                                                                                                                                                                                                                                                                                                                                                                                                                                                                                                                                                                                                                                                                                                                                                                                                                                                                             |

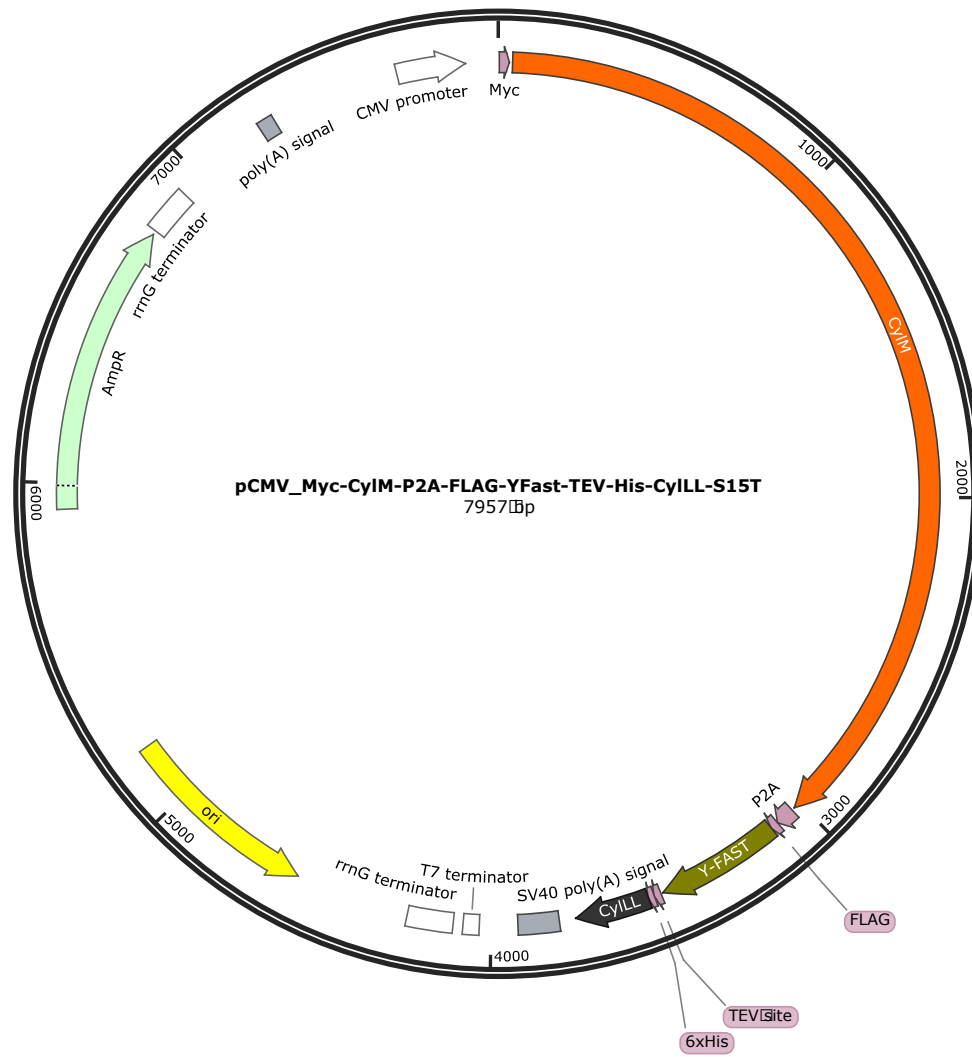

Figure S1: Mammalian expression vector for lanthipeptide production.

Dhb Dhb P V C A V A A Dhb A A A Dha Dha A A C G W V G G G I F Dhb G V Dhb V V V Dha L K H C  
 y8 y7 y6 y5

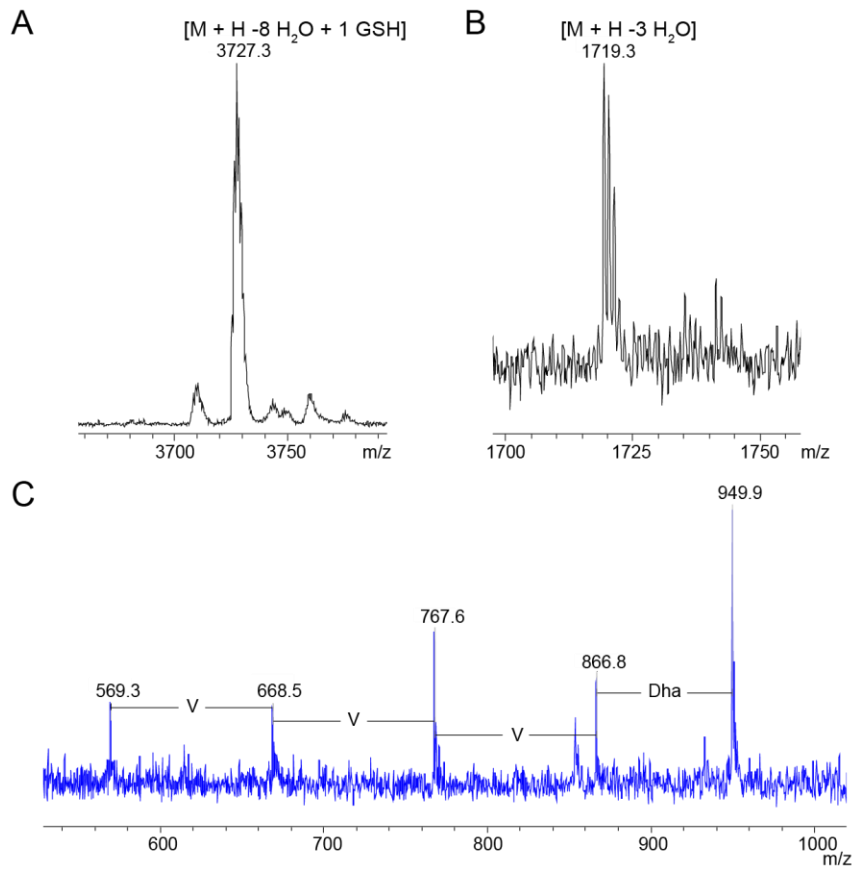

Figure S2: Presence of glutathione adduct in CyLL co-expressed with CyIM in HEK293 cells. A) MALDI-TOF mass spectrum of 8-fold dehydrated CyLL” with a GSH adduct. The peptide was purified via Ni-NTA affinity chromatography and digested with CylA. B) MALDI-TOF mass spectrum of the yellow highlighted CyLL fragment post-chymotrypsin digest. C) LIFT analysis of the 1719 Da fragment.

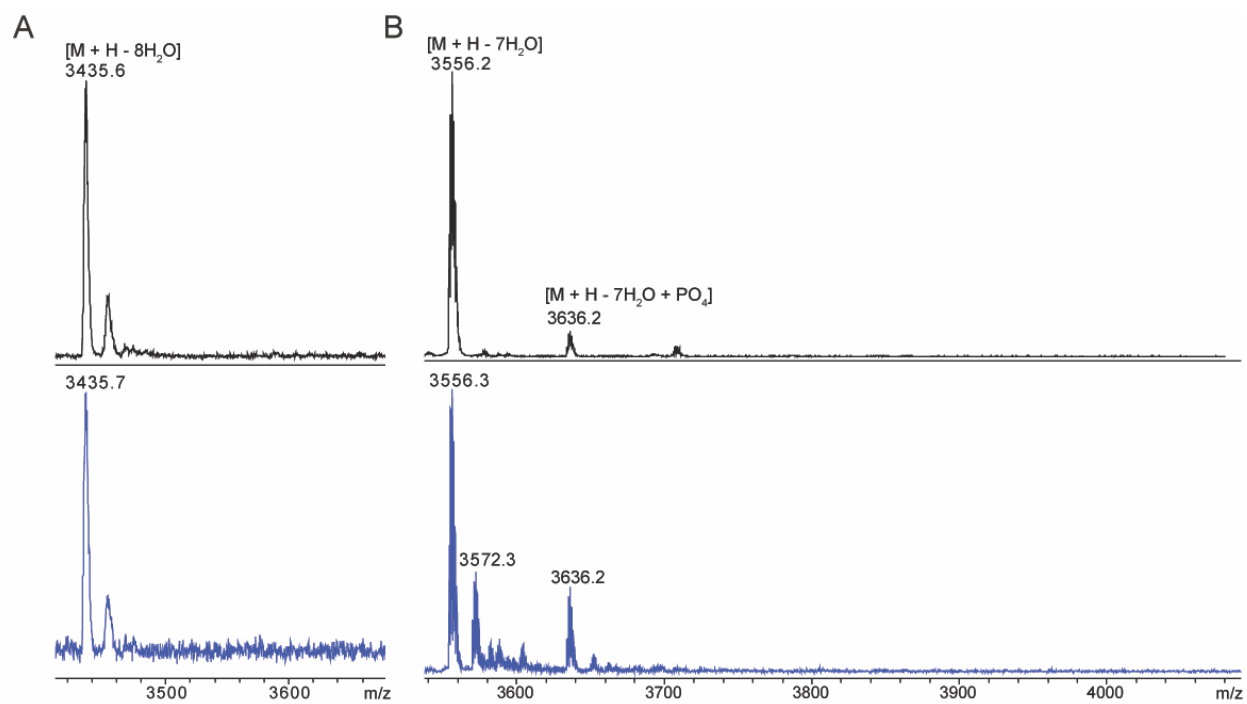

Figure S3: MALDI-TOF mass spectra of (A) CylL-S15T and (B) HalA2 co-expressed with CylM and HalM2, respectively, before (black) and after (blue) IAA (A) or NEM (B) reaction. Peptides were expressed in Expi293 cells and purified via Ni-NTA chromatography and analytical HPLC. CylL-S15T and HalA2 were digested with CylA and GluC, respectively. Reaction products were desalted via C4 ziptip.

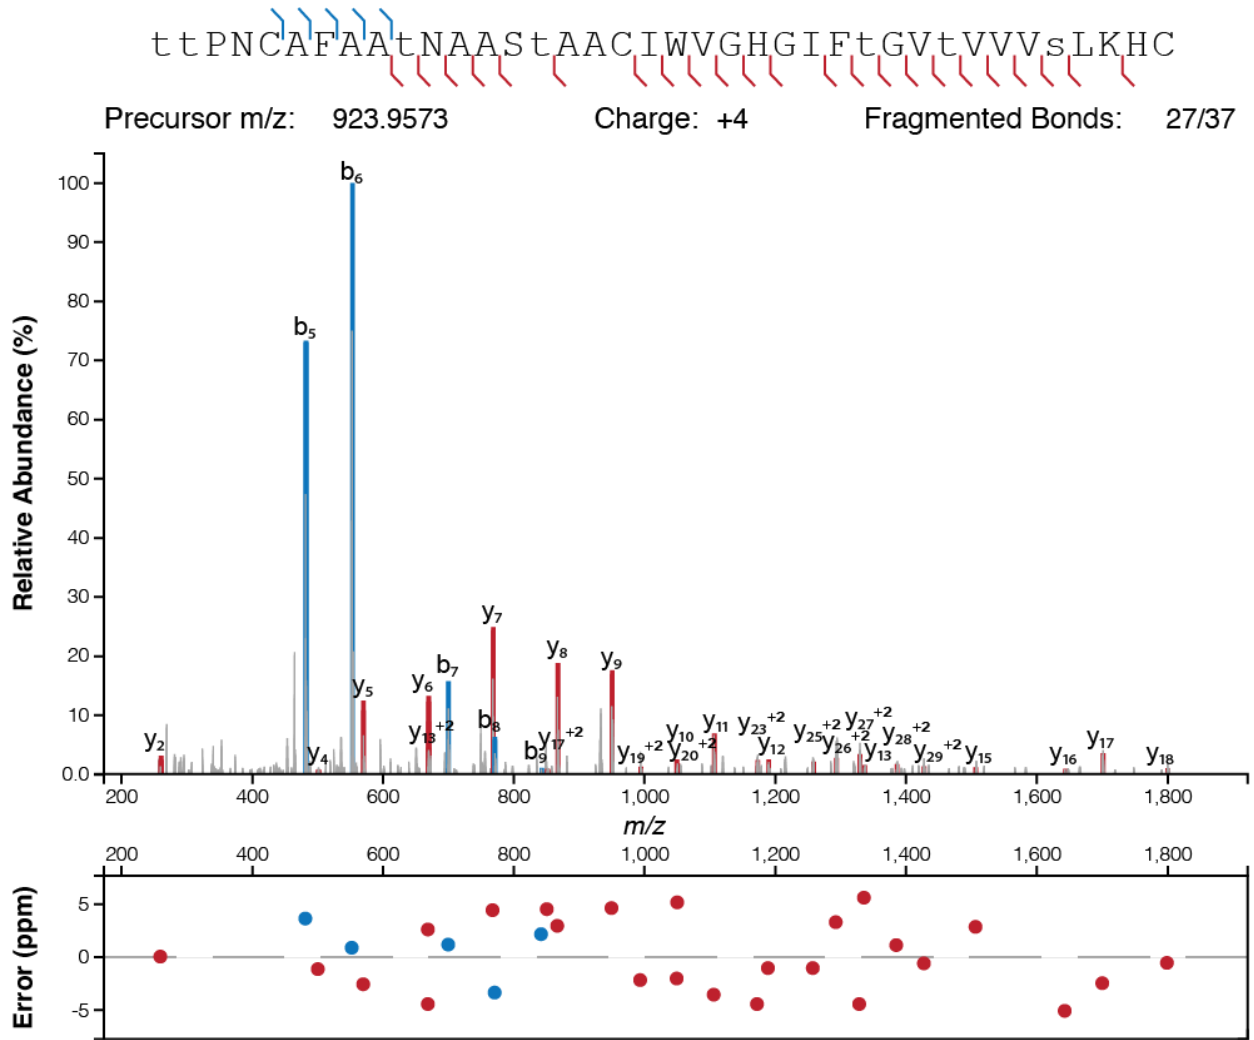

Figure S4: High-resolution MS/MS spectrum of CylL<sub>L</sub>-S15T variant NDT1 co-expressed with CylM in Expi293 cells. Peptide was purified via Ni-NTA affinity chromatography and digested with CylA. A graph of the ppm errors for each identified ion is shown.<sup>74</sup>

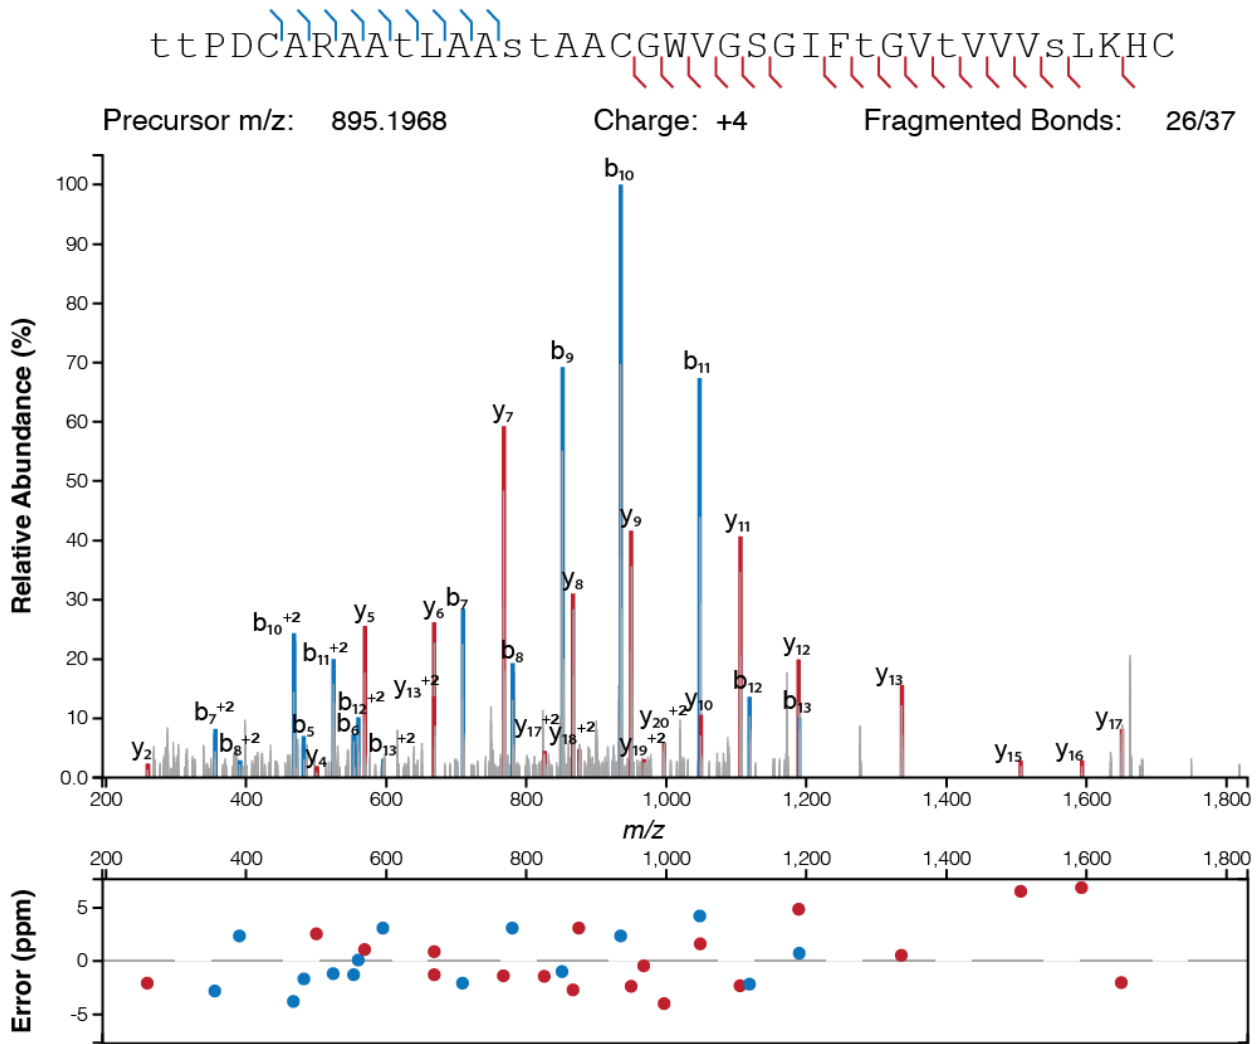

Figure S5: High-resolution MS/MS spectrum of CylL-S15T variant NDT2 co-expressed with CylM in Expi293 cells. Peptide was purified via Ni-NTA affinity chromatography and digested with CylA. A graph of the ppm errors for each identified ion is shown.<sup>74</sup>

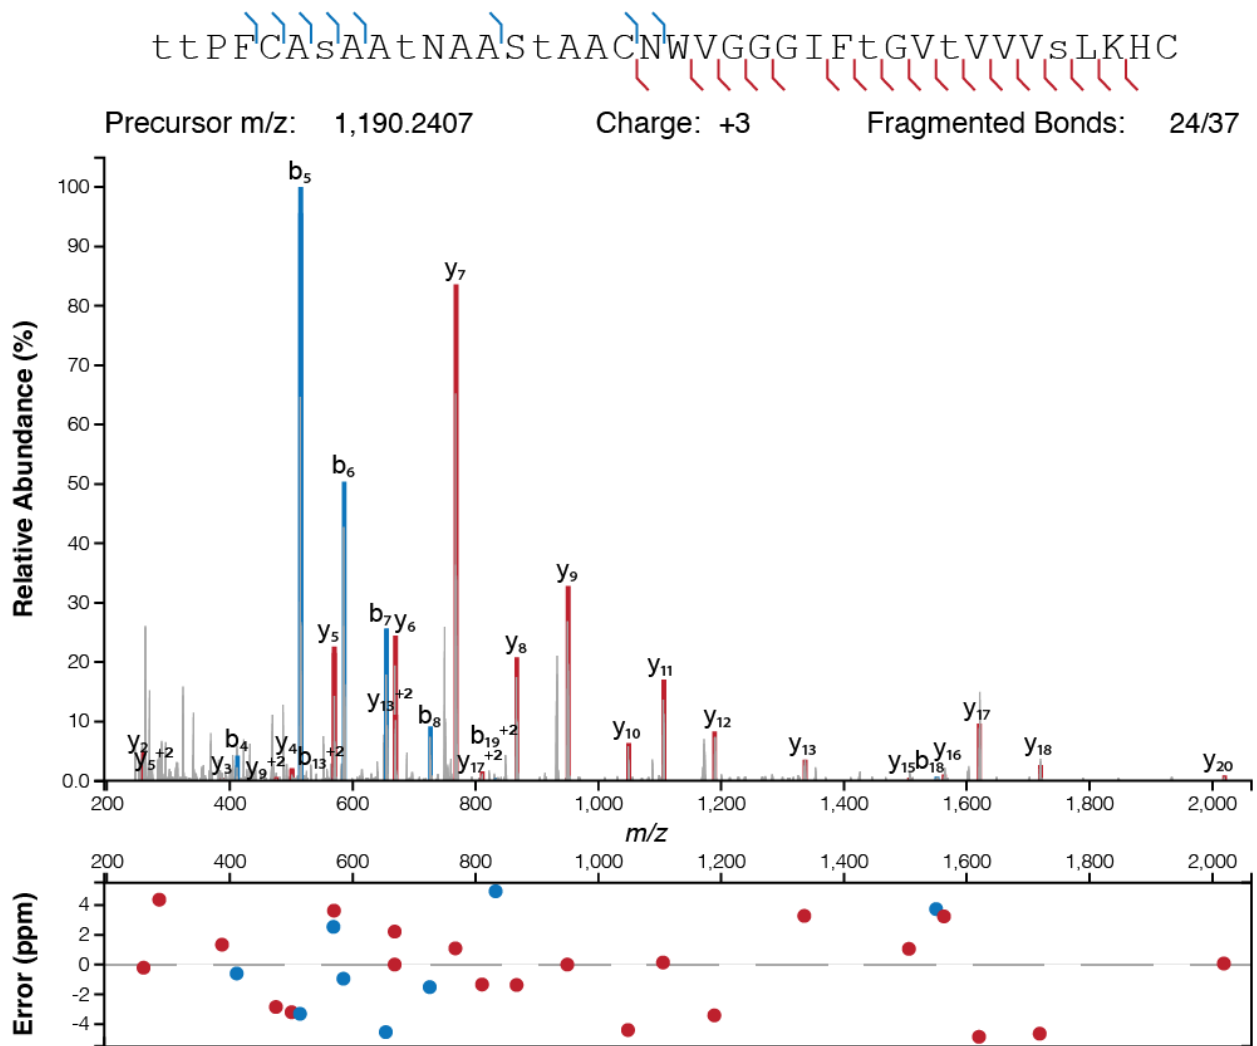

Figure S6: High-resolution MS/MS spectrum of CyLL<sup>n</sup>-S15T mutant NDT3 expressed in Expi293. Peptide was purified via Ni-NTA affinity chromatography and digested with CylA. A graph of the ppm errors for each identified ion is shown.<sup>74</sup>



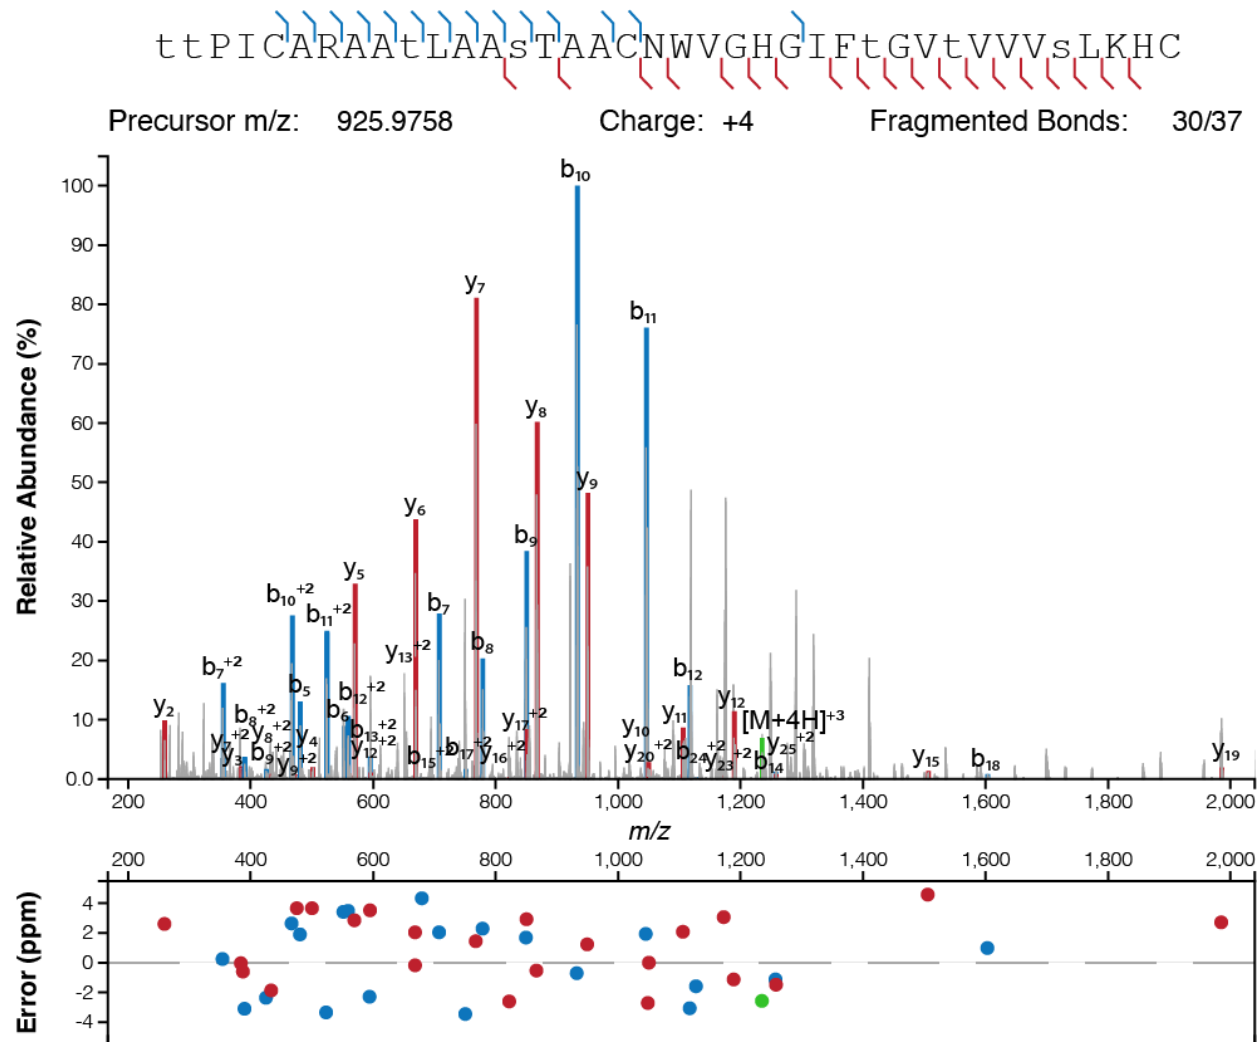

Figure S7: High-resolution MS/MS spectrum of CylL<sup>S15T</sup> mutant NDT4 expressed in Expi293. Peptide was purified via Ni-NTA affinity chromatography and digested with CylA. A graph of the ppm errors for each identified ion is shown.<sup>74</sup>

CyIL<sub>L</sub>"-S15T

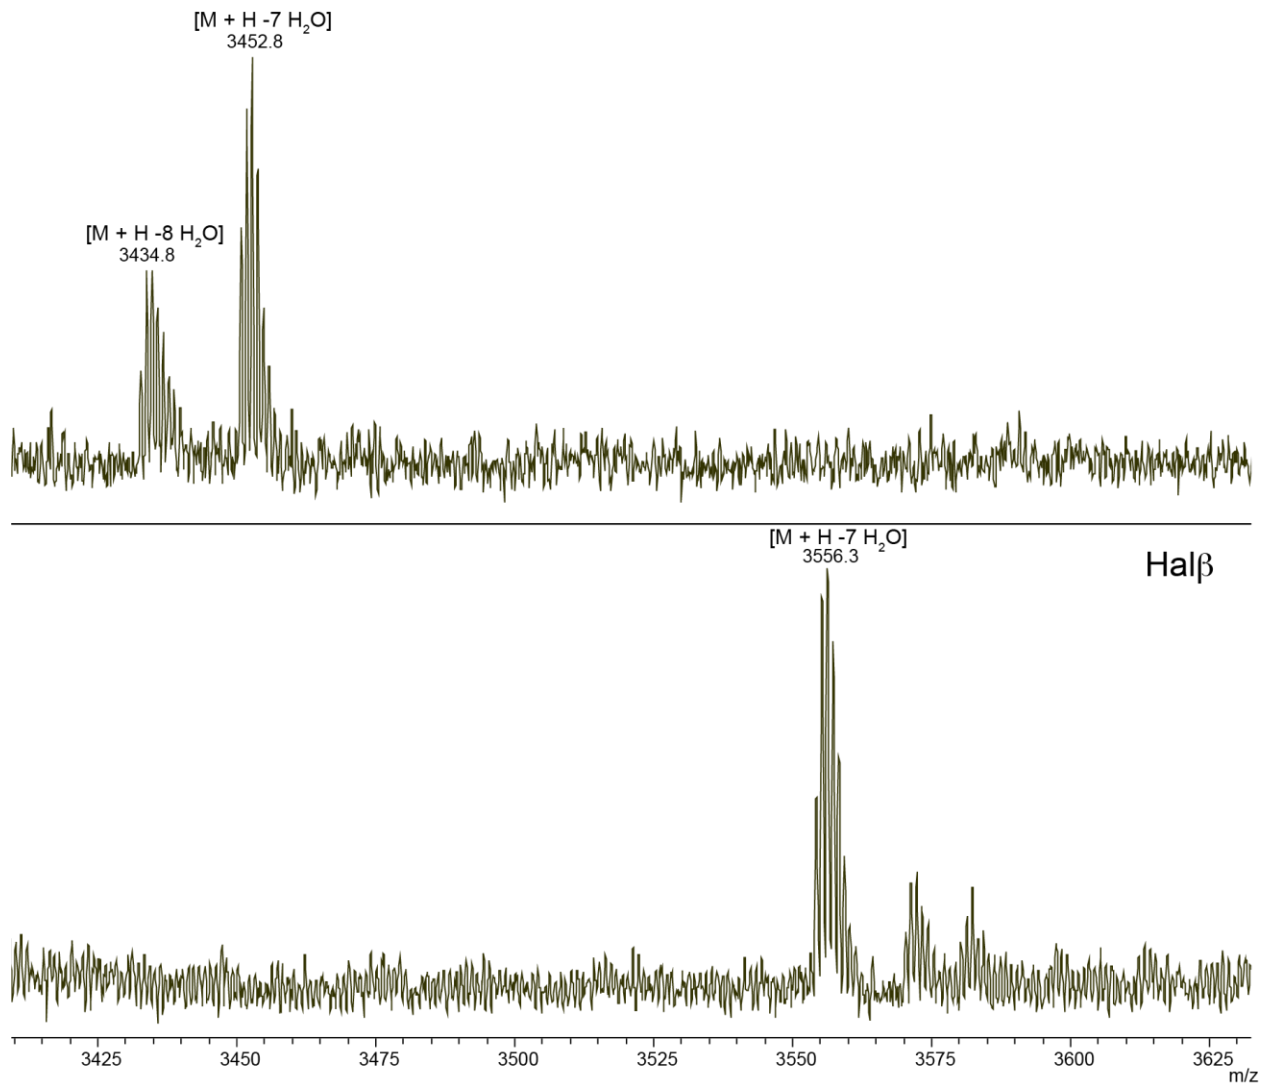

Figure S8: MALDI-TOF mass spectra of nuclear targeted CyIL<sub>L</sub>-S15T and nuclear targeted HalA2 co-expressed with CyIM and HalM2, respectively, in Expi293 cells. CyIL<sub>L</sub>-S15T and HalA2 were digested with CylA and GluC respectively.
